# Supplementary material
Source: PubMed Central journal article supplement (PMC4045013)

# Supplemental Figure 1

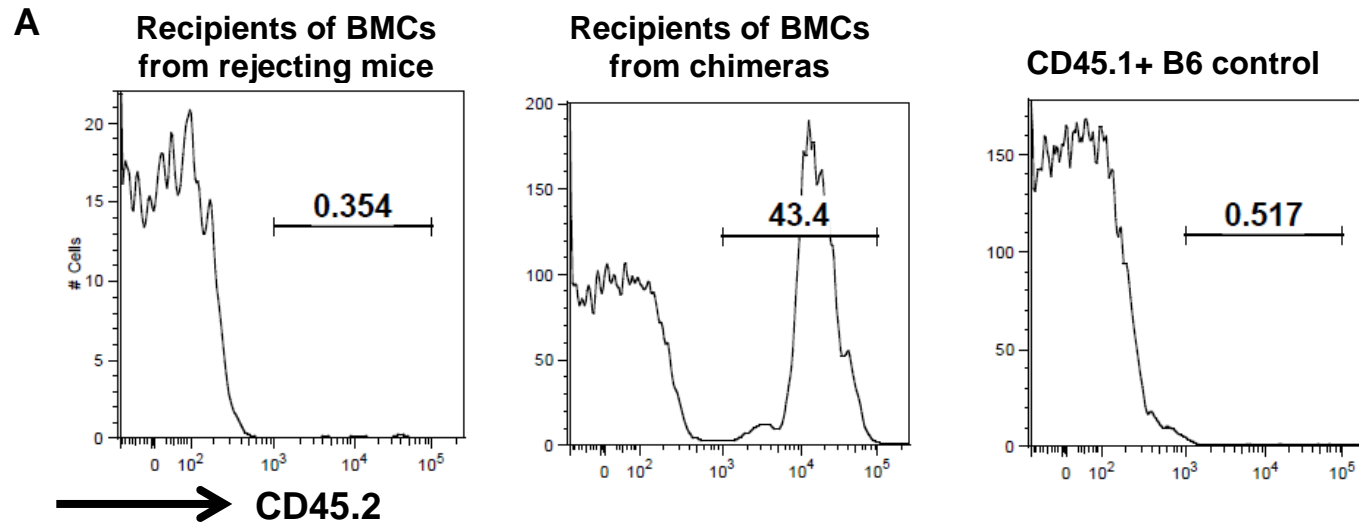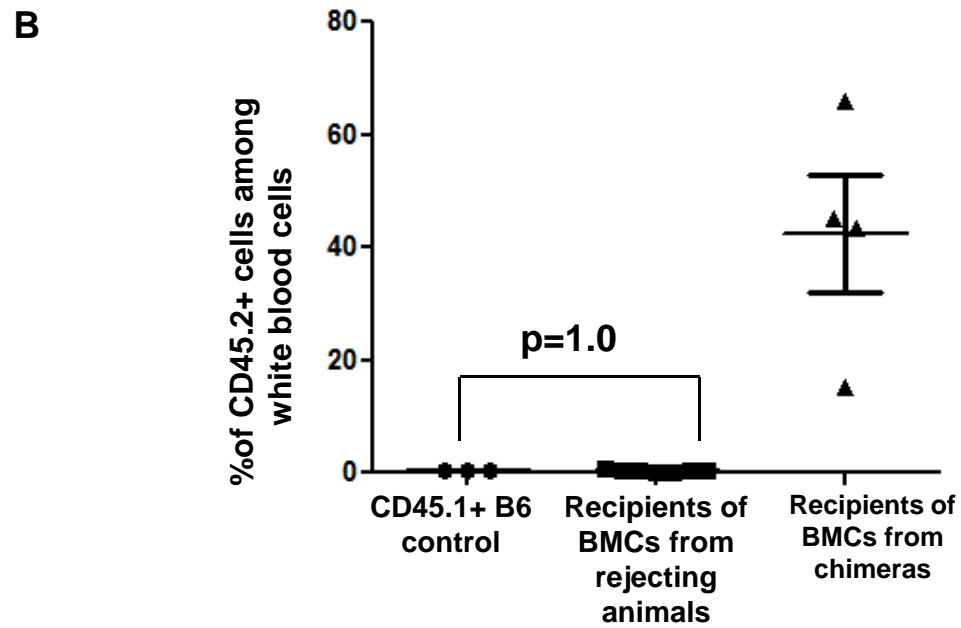

Supplement: NIHMS575823-supplement-Supp_Fig_1.pdf [file NIHMS575823-supplement-Supp_Fig_1.pdf]
